# Supplementary material for: Genetic Dissection of Phosphorus Use Efficiency in a Maize Association Population under Two P Levels in the Field
Source: MDPI journal article supplement (doi:10.3390/ijms22179311), 2021-08-27
Supplement: s1 [file s1]

**Table S3.** A description of traits in this study

| Trait                                 | Abbreviation | Description                                                                       |
|---------------------------------------|--------------|-----------------------------------------------------------------------------------|
| Yield per plant (g)                   | YPP          | Grain yield divide by plant number harvested                                      |
| Shoot dry weight per plant (g)        | SDWPP        | Shoot was dried at 65°C to a constant weight and divide by plant number harvested |
| All dry weight per plant (g)          | ADWPP        | Dried weight (ear and shoot) divide by plant number harvested                     |
| Seed P concentration (mg/g)           | SePCc        | The P content per gram of dried grain                                             |
| Shoot P concentration (mg/g)          | ShPCc        | The P content per gram of dried shoot                                             |
| Seed P content per plant (mg)         | SePCPP       | $YPP \times SePCc$                                                                |
| Shoot P content per plant (mg)        | ShPCPP       | $SDWPP \times ShPCc$                                                              |
| All P content per plant (mg)          | APCPP        | $SePCPP + ShPCPP$                                                                 |
| Seed P utilization efficiency (g/mg)  | SePUtE       | inverse of SePCc                                                                  |
| Shoot P utilization efficiency (g/mg) | ShPUtE       | inverse of ShPCc                                                                  |
| All P utilization efficiency (g/mg)   | APUtE        | $ADWPP \div APCPP$                                                                |
