# Supplementary material for: Genetic Dissection of Phosphorus Use Efficiency in a Maize Association Population under Two P Levels in the Field
Source: MDPI journal article supplement (doi:10.3390/ijms22179311), 2021-08-27
Supplement: s1 [file s1]

## Figures:

**Figure S1.** Distribution and interaction of traits under low-P and normal-P trials. **(A)** YPP. **(B)** SePCc. **(C)** SDWPP. **(D)** ShPCc. **(E)** ADWPP. YPP: Yield per plant; SePCc: Seed P concentration; SDWPP: Shoot dry weight per plant; ShPCc: Shoot P concentration; ADWPP: All dry weight per plant. The significant difference was calculated by t-tests between the phenotypes under low-P and normal-P conditions for all traits.

**Figure S2.** The correlations of LPTI for eleven traits. YPP: Yield per plant; SDWPP: Shoot dry weight per plant; ADWPP: All dry weight per plant; SePCc: Seed P concentration; ShPCc: Shoot P concentration; SePCPP: Seed P content per plant; ShPCPP: Shoot P content per plant; APCPP: P content per plant; SePUtE: Seed P utilization efficiency; ShPUtE: Shoot P utilization efficiency; APUtE: All P utilization efficiency. \*:  $p < 0.05$ ; \*\*:  $p < 0.01$ ; \*\*\*:  $p < 0.001$ .

**Figure S3.** The boxplots of four subgroups of five traits under low-P condition. **(A)** YPP. **(B)** SePCc. **(C)** SDWPP. **(D)** ShPCc. **(E)** ADWPP. These four subpopulations are mixed ( $n = 101$ ), non-stiff stalk (NSS,  $n = 118$ ), stiff stalk (SS,  $n = 29$ ), tropical/subtropical (TST,  $n = 111$ ). Multiple comparisons were conducted by the LSD test method at a 0.05 significance level. Different letters represent significant differences. The rhombus in the boxplot is the mean value. YPP: Yield per plant; SePCc: Seed P concentration; SDWPP: Shoot dry weight per plant; ShPCc: Shoot P concentration; ADWPP: All dry weight per plant.

**Figure S4.** Manhattan (left) and quantile-quantile (right) plot of eleven traits under low-P condition. **(A)** YPP. **(B)** SDWPP. **(C)** ADWPP. **(D)** SePCc. **(E)** ShPCc. **(F)** SePCPP. **(G)** ShPCPP. **(H)** APCPP. **(I)** SePUtE. **(J)** APUtE. YPP: Yield per plant; SDWPP: Shoot dry weight per plant; ADWPP: All dry weight per plant; SePCc: Seed P concentration; ShPCc: Shoot P concentration; SePCPP: Seed P content per plant; ShPCPP: Shoot P content per plant; APCPP: P content per plant; SePUtE: Seed P utilization efficiency; ShPUtE: Shoot P utilization efficiency; APUtE: All P utilization efficiency.

**Figure S5.** Manhattan (left) and quantile-quantile (right) plot of eleven traits under normal-P condition. **(A)** YPP. **(B)** SDWPP. **(C)** ADWPP. **(D)** SePCc. **(E)** ShPCc. **(F)** SePCPP. **(G)** ShPCPP. **(H)** APCPP. **(I)** SePUtE. **(J)** ShPUtE. **(K)** APUtE. YPP: Yield per plant; SDWPP: Shoot dry weight per plant; ADWPP: All dry weight per plant; SePCc: Seed P concentration; ShPCc: Shoot P concentration; SePCPP: Seed P content per plant; ShPCPP: Shoot P content per plant; APCPP: P content per plant; SePUtE: Seed P utilization efficiency; ShPUtE: Shoot P utilization efficiency; APUtE: All P utilization efficiency.

**Figure S6.** Manhattan (left) and quantile-quantile (right) plot for LPTI of eleven traits across both P levels. **(A)** YPP. **(B)** SDWPP. **(C)** ADWPP. **(D)** SePCc. **(E)** ShPCc. **(F)** SePCPP. **(G)** ShPCPP. **(H)** APCPP. **(I)** SePUtE. **(J)** ShPUtE. **(K)** APUtE. YPP: Yield per plant; SDWPP: Shoot dry weight per plant; ADWPP: All dry weight per plant; SePCc: Seed P concentration; ShPCc: Shoot P concentration; SePCPP: Seed P content per plant; ShPCPP: Shoot P content per plant; APCPP: P content per plant; SePUtE: Seed P utilization efficiency; ShPUtE: Shoot P utilization efficiency; APUtE: All P utilization efficiency.

**Figure S7.** The structure of GRMZM5G848945 and pairwise LD analysis. The dotted line is the significant threshold of 4.94.

**Figure S8.** The structure of GRMZM2G030762 and pairwise LD analysis. The dotted line is the significant threshold of 4.94.

**Figure S9.** The prediction ability of GBLUP of eleven traits in the low-P, normal-P and LPTI datasets. Yield per plant; SDWPP: Shoot dry weight per plant; ADWPP: All dry weight per plant; SePCc: Seed P concentration; ShPCc: Shoot P concentration; SePCPP: Seed P content per plant; ShPCPP: Shoot P content per plant; APCPP: P content per plant; SePUtE: Seed P utilization efficiency; ShPUtE: Shoot P utilization efficiency; APUtE: All P utilization efficiency.

**Tables:**

**Table S1.** Candidate genes of 11 traits under the two P conditions and LPTI dataset

**Table S2.** Information of PHT1 gene family in four species

**Table S3.** A description of traits in this study
