# Supplementary material for: Genetic Dissection of Phosphorus Use Efficiency in a Maize Association Population under Two P Levels in the Field
Source: MDPI journal article supplement (doi:10.3390/ijms22179311), 2021-08-27
Supplement: s1 [file s1]

**Table S1.** Summary significant SNP of all traits under the two P conditions and LPTI

| SNP              | Chr. | position  | $-\log_{10} P$ | Trait  | Condition | Gene          | Maker position |
|------------------|------|-----------|----------------|--------|-----------|---------------|----------------|
| chr2.S_215941022 | 2    | 216609992 | 5.16           | APCPP  | LP        | GRMZM2G158766 | WithinGene     |
| chr8.S_119905885 | 8    | 119432925 | 5.1            | APCPP  | LP        | GRMZM2G004703 | WithinGene     |
| chr8.S_119905885 | 8    | 119432925 | 5.1            | APCPP  | LP        | GRMZM5G895362 | WithinGene     |
| chr8.S_153045260 | 8    | 152583441 | 5.51           | APCPP  | LP        | GRMZM2G032484 | WithinGene     |
| chr8.S_153045337 | 8    | 152583518 | 5.51           | APCPP  | LP        | GRMZM2G032484 | WithinGene     |
| chr8.S_153045506 | 8    | 152583687 | 5.51           | APCPP  | LP        | GRMZM2G032484 | WithinGene     |
| chr8.S_153047685 | 8    | 152585866 | 5.51           | APCPP  | LP        | GRMZM2G032484 | WithinGene     |
| chr8.S_153047929 | 8    | 152586110 | 5.36           | APCPP  | LP        | GRMZM2G032484 | WithinGene     |
| chr2.S_197529123 | 2    | 198182721 | 5.48           | APUtE  | LP        | GRMZM2G312501 | WithinGene     |
| chr7.S_146244617 | 7    | 146280765 | 5.09           | APUtE  | LP        | GRMZM2G042666 | WithinGene     |
| chr7.S_146244618 | 7    | 146280766 | 5.09           | APUtE  | LP        | GRMZM2G042666 | WithinGene     |
| chr3.S_140852927 | 3    | 140881141 | 5.05           | ADWPP  | LP        | GRMZM2G463464 | WithinGene     |
| chr3.S_140853493 | 3    | 140881707 | 5.05           | ADWPP  | LP        | GRMZM2G463464 | WithinGene     |
| chr3.S_140857207 | 3    | 140885421 | 5.16           | ADWPP  | LP        | GRMZM2G463464 | WithinGene     |
| chr2.S_196383637 | 2    | 197033528 | 5.44           | SePCc  | LP        | GRMZM2G151122 | WithinGene     |
| chr5.S_205781313 | 5    | 205838208 | 5.13           | SePCc  | LP        | GRMZM2G140150 | WithinGene     |
| chr8.S_168286541 | 8    | 167837049 | 5.25           | SePCc  | LP        | GRMZM2G149230 | WithinGene     |
| chr8.S_168287312 | 8    | 167837820 | 5.27           | SePCc  | LP        | GRMZM2G149230 | WithinGene     |
| chr8.S_168287510 | 8    | 167838018 | 5.25           | SePCc  | LP        | GRMZM2G149230 | WithinGene     |
| chr8.S_168287559 | 8    | 167838067 | 5.25           | SePCc  | LP        | GRMZM2G149230 | WithinGene     |
| chr8.S_168289605 | 8    | 167840113 | 5.25           | SePCc  | LP        | GRMZM2G149230 | WithinGene     |
| chr8.S_168290170 | 8    | 167840678 | 5.25           | SePCc  | LP        | GRMZM2G149230 | WithinGene     |
| chr8.S_168290213 | 8    | 167840721 | 5.44           | SePCc  | LP        | GRMZM2G149230 | WithinGene     |
| chr8.S_168290214 | 8    | 167840722 | 5.44           | SePCc  | LP        | GRMZM2G149230 | WithinGene     |
| chr8.S_168290216 | 8    | 167840724 | 5.44           | SePCc  | LP        | GRMZM2G149230 | WithinGene     |
| chr8.S_168290339 | 8    | 167840847 | 5.25           | SePCc  | LP        | GRMZM2G149230 | WithinGene     |
| chr1.S_28643451  | 1    | 28644019  | 5.12           | SePCPP | LP        | GRMZM2G040828 | WithinGene     |
| chr3.S_5580300   | 3    | 5581618   | 7.03           | SePCPP | LP        | GRMZM2G143235 | WithinGene     |
| chr5.S_21933463  | 5    | 21954744  | 5.43           | SePCPP | LP        | GRMZM2G096372 | WithinGene     |
| chr8.S_162559636 | 8    | 162109084 | 7.17           | SePCPP | LP        | GRMZM2G030762 | WithinGene     |
| chr9.S_26819179  | 9    | 26832567  | 7.87           | SePCPP | LP        | GRMZM2G475293 | WithinGene     |
| chr10.S_26090270 | 10   | 26098212  | 7.06           | SePCPP | LP        | GRMZM2G050394 | WithinGene     |
| chr10.S_77270047 | 10   | 77283397  | 5.4            | SePCPP | LP        | GRMZM2G110145 | WithinGene     |
| chr2.S_196383637 | 2    | 197033528 | 5.11           | SePUtE | LP        | GRMZM2G151122 | WithinGene     |
| chr5.S_205781313 | 5    | 205838208 | 4.95           | SePUtE | LP        | GRMZM2G140150 | WithinGene     |
| chr1.S_5532257   | 1    | 5525913   | 5              | ShPCc  | LP        | GRMZM2G055704 | WithinGene     |
| chr1.S_5532257   | 1    | 5525913   | 5              | ShPCc  | LP        | GRMZM5G802002 | WithinGene     |
| chr2.S_44201877  | 2    | 44830522  | 11.13          | ShPCc  | LP        | GRMZM2G171254 | WithinGene     |
| chr2.S_44201877  | 2    | 44830522  | 11.13          | ShPCc  | LP        | GRMZM2G171277 | WithinGene     |
| chr2.S_216686343 | 2    | 217355313 | 5.67           | ShPCc  | LP        | GRMZM2G001297 | WithinGene     |
| chr9.S_4221767   | 9    | 4221990   | 5.16           | ShPCc  | LP        | GRMZM2G563453 | WithinGene     |
| chr5.S_61803436  | 5    | 61831685  | 4.98           | ShPCPP | LP        | GRMZM2G069923 | WithinGene     |

|                  |   |           |      |        |    |                  |            |
|------------------|---|-----------|------|--------|----|------------------|------------|
| chr5.S_175732995 | 5 | 175779671 | 5.59 | ShPCPP | LP | GRMZM2G025236    | WithinGene |
| chr6.S_128467569 | 6 | 128650528 | 5.03 | ShPCPP | LP | GRMZM2G019180    | WithinGene |
| chr6.S_128467669 | 6 | 128650628 | 5.03 | ShPCPP | LP | GRMZM2G019180    | WithinGene |
| chr6.S_128467673 | 6 | 128650632 | 5.03 | ShPCPP | LP | GRMZM2G019180    | WithinGene |
| chr6.S_128467713 | 6 | 128650672 | 4.95 | ShPCPP | LP | GRMZM2G019180    | WithinGene |
| chr6.S_128467740 | 6 | 128650699 | 4.95 | ShPCPP | LP | GRMZM2G019180    | WithinGene |
| chr6.S_128483844 | 6 | 128666803 | 5.41 | ShPCPP | LP | GRMZM2G008252    | WithinGene |
| chr6.S_128483844 | 6 | 128666803 | 5.41 | ShPCPP | LP | AC207798.2_FG003 | WithinGene |
| chr6.S_128483856 | 6 | 128666815 | 4.97 | ShPCPP | LP | GRMZM2G008252    | WithinGene |
| chr6.S_128483856 | 6 | 128666815 | 4.97 | ShPCPP | LP | AC207798.2_FG003 | WithinGene |
| chr8.S_153045260 | 8 | 152583441 | 5.68 | ShPCPP | LP | GRMZM2G032484    | WithinGene |
| chr8.S_153045337 | 8 | 152583518 | 5.68 | ShPCPP | LP | GRMZM2G032484    | WithinGene |
| chr8.S_153045506 | 8 | 152583687 | 5.68 | ShPCPP | LP | GRMZM2G032484    | WithinGene |
| chr8.S_153047685 | 8 | 152585866 | 5.49 | ShPCPP | LP | GRMZM2G032484    | WithinGene |
| chr8.S_153047929 | 8 | 152586110 | 5.18 | ShPCPP | LP | GRMZM2G032484    | WithinGene |
| chr2.S_44040366  | 2 | 44669011  | 5.63 | ShPUtE | LP | GRMZM2G703021    | WithinGene |
| chr2.S_44201861  | 2 | 44830506  | 5.04 | ShPUtE | LP | GRMZM2G171254    | WithinGene |
| chr2.S_44201861  | 2 | 44830506  | 5.04 | ShPUtE | LP | GRMZM2G171277    | WithinGene |
| chr2.S_44201877  | 2 | 44830522  | 5.49 | ShPUtE | LP | GRMZM2G171254    | WithinGene |
| chr2.S_44201877  | 2 | 44830522  | 5.49 | ShPUtE | LP | GRMZM2G171277    | WithinGene |
| chr2.S_44201924  | 2 | 44830569  | 5.7  | ShPUtE | LP | GRMZM2G171254    | WithinGene |
| chr2.S_44201924  | 2 | 44830569  | 5.7  | ShPUtE | LP | GRMZM2G171277    | WithinGene |
| chr2.S_44553517  | 2 | 45182162  | 5.17 | ShPUtE | LP | GRMZM2G046402    | WithinGene |
| chr2.S_44553561  | 2 | 45182206  | 5.17 | ShPUtE | LP | GRMZM2G046402    | WithinGene |
| chr2.S_44553619  | 2 | 45182264  | 5.17 | ShPUtE | LP | GRMZM2G046402    | WithinGene |
| chr2.S_44553622  | 2 | 45182267  | 5.17 | ShPUtE | LP | GRMZM2G046402    | WithinGene |
| chr2.S_44554556  | 2 | 45183201  | 5.17 | ShPUtE | LP | GRMZM2G046402    | WithinGene |
| chr2.S_44554774  | 2 | 45183419  | 5.17 | ShPUtE | LP | GRMZM2G046402    | WithinGene |
| chr2.S_44557153  | 2 | 45185798  | 5.17 | ShPUtE | LP | GRMZM2G046402    | WithinGene |
| chr2.S_44557480  | 2 | 45186125  | 5.17 | ShPUtE | LP | GRMZM2G046402    | WithinGene |
| chr2.S_44561004  | 2 | 45189649  | 5.17 | ShPUtE | LP | GRMZM2G046402    | WithinGene |
| chr2.S_44561123  | 2 | 45189768  | 5.17 | ShPUtE | LP | GRMZM2G046402    | WithinGene |
| chr2.S_44561635  | 2 | 45190280  | 5.17 | ShPUtE | LP | GRMZM2G046402    | WithinGene |
| chr2.S_44561636  | 2 | 45190281  | 5.17 | ShPUtE | LP | GRMZM2G046402    | WithinGene |
| chr2.S_44561637  | 2 | 45190282  | 5.17 | ShPUtE | LP | GRMZM2G046402    | WithinGene |
| chr2.S_44561639  | 2 | 45190284  | 5.17 | ShPUtE | LP | GRMZM2G046402    | WithinGene |
| chr2.S_45523411  | 2 | 46152056  | 4.97 | ShPUtE | LP | GRMZM2G131321    | WithinGene |
| chr2.S_45523465  | 2 | 46152110  | 5.23 | ShPUtE | LP | GRMZM2G131321    | WithinGene |
| chr2.S_45523880  | 2 | 46152525  | 4.98 | ShPUtE | LP | GRMZM2G131321    | WithinGene |
| chr2.S_45523898  | 2 | 46152543  | 5.23 | ShPUtE | LP | GRMZM2G131321    | WithinGene |
| chr2.S_45524407  | 2 | 46153052  | 4.97 | ShPUtE | LP | GRMZM2G131448    | WithinGene |
| chr2.S_45524576  | 2 | 46153221  | 5.23 | ShPUtE | LP | GRMZM2G131448    | WithinGene |
| chr2.S_45525833  | 2 | 46154478  | 4.97 | ShPUtE | LP | GRMZM2G131448    | WithinGene |
| chr2.S_65038237  | 2 | 65668640  | 5.15 | ShPUtE | LP | GRMZM5G848945    | WithinGene |

|                  |    |           |       |        |    |               |            |
|------------------|----|-----------|-------|--------|----|---------------|------------|
| chr2.S_65038546  | 2  | 65668949  | 5.07  | ShPUtE | LP | GRMZM5G848945 | WithinGene |
| chr2.S_65038633  | 2  | 65669036  | 5.07  | ShPUtE | LP | GRMZM5G848945 | WithinGene |
| chr2.S_65038693  | 2  | 65669096  | 5.07  | ShPUtE | LP | GRMZM5G848945 | WithinGene |
| chr5.S_31881708  | 5  | 31901549  | 5     | ShPUtE | LP | GRMZM2G326707 | WithinGene |
| chr5.S_32921625  | 5  | 32941366  | 5.26  | ShPUtE | LP | GRMZM2G465728 | WithinGene |
| chr5.S_32921626  | 5  | 32941367  | 5.26  | ShPUtE | LP | GRMZM2G465728 | WithinGene |
| PZE-101210110    | 1  | 259440409 | 5.13  | SDWPP  | LP | GRMZM2G038677 | WithinGene |
| chr2.S_233744569 | 2  | 234414624 | 5.58  | SDWPP  | LP | GRMZM5G878490 | WithinGene |
| chr3.S_140847548 | 3  | 140875762 | 7.54  | SDWPP  | LP | GRMZM2G163476 | InterGene  |
| chr3.S_140847548 | 3  | 140875762 | 7.54  | SDWPP  | LP | GRMZM2G463464 | InterGene  |
| chr3.S_189468910 | 3  | 189527658 | 12.58 | SDWPP  | LP | GRMZM5G801031 | WithinGene |
| chr3.S_219398419 | 3  | 219482603 | 4.94  | SDWPP  | LP | GRMZM2G061723 | WithinGene |
| chr4.S_198119781 | 4  | 198297622 | 4.95  | SDWPP  | LP | GRMZM2G067555 | WithinGene |
| chr4.S_198119790 | 4  | 198297631 | 4.95  | SDWPP  | LP | GRMZM2G067555 | WithinGene |
| chr4.S_234211637 | 4  | 234750870 | 5.01  | SDWPP  | LP | GRMZM2G084296 | WithinGene |
| chr7.S_136178412 | 7  | 136212881 | 5.1   | SDWPP  | LP | GRMZM5G867125 | WithinGene |
| chr8.S_104461014 | 8  | 103983158 | 9.75  | SDWPP  | LP | GRMZM2G047152 | WithinGene |
| chr9.S_89707199  | 9  | 90713476  | 6.58  | SDWPP  | LP | GRMZM2G442551 | WithinGene |
| chr9.S_89707222  | 9  | 90713499  | 6.58  | SDWPP  | LP | GRMZM2G442551 | WithinGene |
| PZE-109051911    | 9  | 90731240  | 5.35  | SDWPP  | LP | GRMZM2G567962 | WithinGene |
| chr1.S_43757872  | 1  | 43762394  | 5.96  | YPP    | LP | GRMZM2G141273 | WithinGene |
| chr2.S_36445844  | 2  | 37074813  | 6.88  | YPP    | LP | GRMZM2G130109 | WithinGene |
| PZE-109002002    | 9  | 2486194   | 5.29  | YPP    | LP | GRMZM2G016275 | WithinGene |
| chr10.S_26090270 | 10 | 26098212  | 9.86  | YPP    | LP | GRMZM2G050394 | WithinGene |
| chr3.S_194053777 | 3  | 194117335 | 11.28 | APCPP  | NP | GRMZM2G152461 | WithinGene |
| chr3.S_197281874 | 3  | 197351697 | 11.81 | APCPP  | NP | GRMZM2G069694 | WithinGene |
| chr4.S_90032984  | 4  | 90058996  | 7.31  | APCPP  | NP | GRMZM2G133969 | WithinGene |
| chr5.S_168223085 | 5  | 168263560 | 7.76  | APCPP  | NP | GRMZM2G059851 | WithinGene |
| chr7.S_5095645   | 7  | 5100589   | 8.3   | APCPP  | NP | GRMZM2G011858 | WithinGene |
| chr7.S_104756249 | 7  | 104784426 | 9.95  | APCPP  | NP | GRMZM2G010389 | WithinGene |
| chr10.S_3275321  | 10 | 3278276   | 7.56  | APCPP  | NP | GRMZM5G873586 | WithinGene |
| chr1.S_41957970  | 1  | 41962492  | 5     | APUtE  | NP | GRMZM2G044237 | WithinGene |
| chr1.S_207321298 | 1  | 207365547 | 5.19  | APUtE  | NP | GRMZM2G460383 | WithinGene |
| chr2.S_44201861  | 2  | 44830506  | 10.04 | APUtE  | NP | GRMZM2G171254 | WithinGene |
| chr2.S_44201861  | 2  | 44830506  | 10.04 | APUtE  | NP | GRMZM2G171277 | WithinGene |
| PZE-102108812    | 2  | 140278799 | 5.72  | APUtE  | NP | GRMZM2G066213 | InterGene  |
| chr4.S_186482132 | 4  | 186657630 | 8.31  | APUtE  | NP | GRMZM5G877788 | WithinGene |
| chr5.S_1528326   | 5  | 1528609   | 9.5   | APUtE  | NP | GRMZM2G448001 | WithinGene |
| chr8.S_6027557   | 8  | 6027997   | 5.56  | APUtE  | NP | GRMZM2G049416 | WithinGene |
| chr1.S_43236278  | 1  | 43240800  | 5.16  | ADWPP  | NP | GRMZM2G109967 | WithinGene |
| chr2.S_205904801 | 2  | 206568370 | 5.31  | ADWPP  | NP | GRMZM2G099622 | WithinGene |
| chr2.S_205905553 | 2  | 206569122 | 5.42  | ADWPP  | NP | GRMZM2G099622 | WithinGene |
| chr2.S_205922590 | 2  | 206586159 | 5.45  | ADWPP  | NP | GRMZM2G099463 | WithinGene |
| chr3.S_168921028 | 3  | 168964362 | 5.45  | ADWPP  | NP | GRMZM5G807064 | WithinGene |

|                        |    |           |       |        |    |                  |            |
|------------------------|----|-----------|-------|--------|----|------------------|------------|
| chr3.S_168921028       | 3  | 168964362 | 5.45  | ADWPP  | NP | GRMZM5G806744    | WithinGene |
| chr4.S_90018830        | 4  | 90044842  | 5.19  | ADWPP  | NP | GRMZM2G133969    | WithinGene |
| chr4.S_92059573        | 4  | 92085485  | 5     | ADWPP  | NP | GRMZM2G068239    | WithinGene |
| chr4.S_191046114       | 4  | 191224055 | 11.25 | ADWPP  | NP | GRMZM2G123355    | WithinGene |
| chr5.S_169842157       | 5  | 169885156 | 5.52  | ADWPP  | NP | GRMZM5G864335    | WithinGene |
| chr7.S_103877574       | 7  | 103905751 | 5.07  | ADWPP  | NP | GRMZM2G315431    | WithinGene |
| chr8.S_149888168       | 8  | 149423590 | 5.04  | ADWPP  | NP | GRMZM2G060516    | WithinGene |
| chr8.S_149888168       | 8  | 149423590 | 5.04  | ADWPP  | NP | AC196465.3_FG002 | WithinGene |
| chr1.S_81639965        | 1  | 81649853  | 5.2   | SePCc  | NP | GRMZM2G066369    | WithinGene |
| chr1.S_290306123       | 1  | 290378327 | 5.38  | SePCc  | NP | GRMZM2G082312    | WithinGene |
| chr2.S_40504144        | 2  | 41132889  | 4.97  | SePCc  | NP | GRMZM2G042443    | WithinGene |
| chr3.S_170545810       | 3  | 170589144 | 5.09  | SePCc  | NP | GRMZM2G011731    | WithinGene |
| chr4.S_69341509        | 4  | 69366402  | 5.22  | SePCc  | NP | AC205521.3_FG003 | WithinGene |
| chr4.S_69342136        | 4  | 69367029  | 5.22  | SePCc  | NP | AC205521.3_FG003 | WithinGene |
| chr6.S_153744795       | 6  | 153938652 | 4.99  | SePCc  | NP | GRMZM2G100639    | WithinGene |
| PUT-163a-76012177-3730 | 1  | 295507524 | 5.3   | SePCPP | NP | GRMZM2G156756    | WithinGene |
| PUT-163a-76012177-3731 | 1  | 295507707 | 5.28  | SePCPP | NP | GRMZM2G156756    | WithinGene |
| chr3.S_157018077       | 3  | 157060281 | 8.5   | SePCPP | NP | GRMZM5G898668    | WithinGene |
| chr4.S_224957242       | 4  | 225495586 | 4.95  | SePCPP | NP | GRMZM2G048733    | WithinGene |
| chr5.S_7775885         | 5  | 7783875   | 9.77  | SePCPP | NP | GRMZM2G077295    | WithinGene |
| chr5.S_173128200       | 5  | 173172610 | 7.11  | SePCPP | NP | GRMZM2G418916    | WithinGene |
| chr8.S_172464084       | 8  | 172017061 | 12.17 | SePCPP | NP | GRMZM2G111511    | WithinGene |
| chr9.S_132885020       | 9  | 133138263 | 5.61  | SePCPP | NP | GRMZM2G102382    | WithinGene |
| chr10.S_9532676        | 10 | 9537083   | 8.15  | SePCPP | NP | GRMZM2G324131    | InterGene  |
| chr1.S_290306123       | 1  | 290378327 | 5.29  | SePUtE | NP | GRMZM2G082312    | WithinGene |
| chr4.S_69341509        | 4  | 69366402  | 5.53  | SePUtE | NP | AC205521.3_FG003 | WithinGene |
| chr4.S_69342136        | 4  | 69367029  | 5.53  | SePUtE | NP | AC205521.3_FG003 | WithinGene |
| chr9.S_151260007       | 9  | 151526421 | 5.48  | SePUtE | NP | GRMZM2G178741    | WithinGene |
| chr2.S_44201861        | 2  | 44830506  | 11.96 | ShPCc  | NP | GRMZM2G171254    | WithinGene |
| chr2.S_44201861        | 2  | 44830506  | 11.96 | ShPCc  | NP | GRMZM2G171277    | WithinGene |
| chr5.S_70045964        | 5  | 70074665  | 5.2   | ShPCc  | NP | GRMZM2G098420    | WithinGene |
| chr5.S_213819919       | 5  | 213868600 | 11.54 | ShPCc  | NP | GRMZM2G100467    | WithinGene |
| chr6.S_156930328       | 6  | 157124806 | 7.73  | ShPCc  | NP | GRMZM2G015100    | WithinGene |
| chr7.S_7280158         | 7  | 7285102   | 5.14  | ShPCc  | NP | GRMZM2G107309    | WithinGene |
| SYN23809               | 8  | 164952669 | 8.97  | ShPCc  | NP | GRMZM2G119314    | WithinGene |
| chr1.S_262321452       | 1  | 262381182 | 5.21  | ShPCPP | NP | GRMZM2G080725    | WithinGene |
| chr9.S_148202483       | 9  | 148460442 | 5.52  | ShPCPP | NP | GRMZM2G181540    | WithinGene |
| chr9.S_148202494       | 9  | 148460453 | 5.24  | ShPCPP | NP | GRMZM2G181540    | WithinGene |
| chr2.S_44201861        | 2  | 44830506  | 7.34  | ShPUtE | NP | GRMZM2G171254    | WithinGene |
| chr2.S_44201861        | 2  | 44830506  | 7.34  | ShPUtE | NP | GRMZM2G171277    | WithinGene |
| SYN1397                | 5  | 189452222 | 7.09  | ShPUtE | NP | GRMZM2G315121    | WithinGene |
| chr5.S_213819919       | 5  | 213868600 | 5.04  | ShPUtE | NP | GRMZM2G100467    | WithinGene |
| SYN23809               | 8  | 164952669 | 5.59  | ShPUtE | NP | GRMZM2G119314    | WithinGene |
| chr8.S_165402790       | 8  | 164952690 | 4.96  | ShPUtE | NP | GRMZM2G119314    | WithinGene |

|                  |   |           |      |        |      |                  |            |
|------------------|---|-----------|------|--------|------|------------------|------------|
| chr8.S_165402818 | 8 | 164952718 | 5.21 | ShPUtE | NP   | GRMZM2G119314    | WithinGene |
| chr8.S_165403065 | 8 | 164952965 | 5.21 | ShPUtE | NP   | GRMZM2G119314    | WithinGene |
| chr8.S_165403068 | 8 | 164952968 | 5.21 | ShPUtE | NP   | GRMZM2G119314    | WithinGene |
| chr8.S_165403374 | 8 | 164953274 | 5.16 | ShPUtE | NP   | GRMZM2G119314    | WithinGene |
| chr8.S_165403485 | 8 | 164953385 | 5.29 | ShPUtE | NP   | GRMZM2G119314    | WithinGene |
| chr8.S_165403659 | 8 | 164953559 | 5.46 | ShPUtE | NP   | GRMZM2G119314    | WithinGene |
| chr8.S_165404620 | 8 | 164954520 | 5.46 | ShPUtE | NP   | GRMZM2G119314    | WithinGene |
| chr8.S_165404683 | 8 | 164954583 | 5.46 | ShPUtE | NP   | GRMZM2G119314    | WithinGene |
| chr8.S_165404728 | 8 | 164954628 | 5.46 | ShPUtE | NP   | GRMZM2G119314    | WithinGene |
| chr8.S_165404768 | 8 | 164954668 | 5.16 | ShPUtE | NP   | GRMZM2G119314    | WithinGene |
| chr4.S_191045769 | 4 | 191223710 | 5.29 | SDWPP  | NP   | GRMZM2G123355    | WithinGene |
| chr4.S_191046111 | 4 | 191224052 | 5.63 | SDWPP  | NP   | GRMZM2G123355    | WithinGene |
| chr4.S_191046113 | 4 | 191224054 | 5.63 | SDWPP  | NP   | GRMZM2G123355    | WithinGene |
| chr4.S_191046114 | 4 | 191224055 | 5.7  | SDWPP  | NP   | GRMZM2G123355    | WithinGene |
| chr4.S_191046115 | 4 | 191224056 | 5.7  | SDWPP  | NP   | GRMZM2G123355    | WithinGene |
| chr4.S_191046116 | 4 | 191224057 | 5.7  | SDWPP  | NP   | GRMZM2G123355    | WithinGene |
| chr5.S_18066742  | 5 | 18088123  | 5.79 | SDWPP  | NP   | GRMZM2G146599    | WithinGene |
| chr5.S_152743178 | 5 | 152782199 | 6.42 | SDWPP  | NP   | GRMZM2G453575    | WithinGene |
| chr2.S_44201877  | 2 | 44830522  | 5.34 | YPP    | NP   | GRMZM2G171254    | WithinGene |
| chr2.S_44201877  | 2 | 44830522  | 5.34 | YPP    | NP   | GRMZM2G171277    | WithinGene |
| chr4.S_228033906 | 4 | 228572345 | 5.01 | YPP    | NP   | GRMZM2G345055    | WithinGene |
| chr5.S_12272921  | 5 | 12284418  | 4.97 | YPP    | NP   | GRMZM2G102754    | WithinGene |
| SYN11171         | 1 | 80081626  | 5.06 | APCPP  | LPTI | GRMZM2G064804    | WithinGene |
| chr1.S_161775544 | 1 | 161791514 | 4.95 | APCPP  | LPTI | GRMZM2G703781    | InterGene  |
| chr1.S_161775544 | 1 | 161791514 | 4.95 | APCPP  | LPTI | AF546187.1_FG001 | InterGene  |
| chr1.S_161775544 | 1 | 161791514 | 4.95 | APCPP  | LPTI | AF546187.1_FG002 | InterGene  |
| chr1.S_161775555 | 1 | 161791525 | 4.95 | APCPP  | LPTI | GRMZM2G703781    | InterGene  |
| chr1.S_161775555 | 1 | 161791525 | 4.95 | APCPP  | LPTI | AF546187.1_FG001 | InterGene  |
| chr1.S_161775555 | 1 | 161791525 | 4.95 | APCPP  | LPTI | AF546187.1_FG002 | InterGene  |
| chr1.S_161776194 | 1 | 161792164 | 5.42 | APCPP  | LPTI | GRMZM2G703781    | InterGene  |
| chr1.S_161776194 | 1 | 161792164 | 5.42 | APCPP  | LPTI | AF546187.1_FG001 | InterGene  |
| chr1.S_161776194 | 1 | 161792164 | 5.42 | APCPP  | LPTI | AF546187.1_FG002 | InterGene  |
| chr1.S_161776212 | 1 | 161792182 | 4.95 | APCPP  | LPTI | GRMZM2G703781    | InterGene  |
| chr1.S_161776212 | 1 | 161792182 | 4.95 | APCPP  | LPTI | AF546187.1_FG001 | InterGene  |
| chr1.S_161776212 | 1 | 161792182 | 4.95 | APCPP  | LPTI | AF546187.1_FG002 | InterGene  |
| chr2.S_207840133 | 2 | 208503702 | 5.77 | APCPP  | LPTI | GRMZM2G431309    | WithinGene |
| chr2.S_207840139 | 2 | 208503708 | 5.77 | APCPP  | LPTI | GRMZM2G431309    | WithinGene |
| chr4.S_224234273 | 4 | 224772617 | 5.14 | APCPP  | LPTI | GRMZM2G016923    | WithinGene |
| PZE-104137492    | 4 | 224774870 | 5.14 | APCPP  | LPTI | GRMZM2G016923    | WithinGene |
| chr7.S_7954766   | 7 | 7959710   | 5.68 | APCPP  | LPTI | GRMZM2G021149    | WithinGene |
| chr7.S_7958420   | 7 | 7963364   | 5.68 | APCPP  | LPTI | GRMZM2G178496    | WithinGene |
| chr7.S_7958427   | 7 | 7963371   | 5.68 | APCPP  | LPTI | GRMZM2G178496    | WithinGene |
| chr8.S_175368631 | 8 | 174922558 | 5.12 | APCPP  | LPTI | GRMZM2G567165    | WithinGene |
| chr1.S_39747873  | 1 | 39752395  | 5.01 | APUtE  | LPTI | GRMZM5G828820    | WithinGene |

|                  |    |           |      |        |      |               |            |
|------------------|----|-----------|------|--------|------|---------------|------------|
| chr1.S_39747874  | 1  | 39752396  | 5.01 | APUtE  | LPTI | GRMZM5G828820 | WithinGene |
| chr3.S_10674683  | 3  | 10680854  | 5.15 | APUtE  | LPTI | GRMZM2G074580 | WithinGene |
| chr8.S_90791443  | 8  | 90301570  | 6.45 | APUtE  | LPTI | GRMZM2G093186 | WithinGene |
| chr1.S_273899522 | 1  | 273966524 | 5.58 | ADWPP  | LPTI | GRMZM2G361593 | WithinGene |
| chr1.S_273899522 | 1  | 273966524 | 5.58 | ADWPP  | LPTI | GRMZM5G863590 | WithinGene |
| chr1.S_273899582 | 1  | 273966584 | 5.58 | ADWPP  | LPTI | GRMZM2G361593 | WithinGene |
| chr1.S_273899582 | 1  | 273966584 | 5.58 | ADWPP  | LPTI | GRMZM5G863590 | WithinGene |
| chr2.S_176452629 | 2  | 177098542 | 5.27 | ADWPP  | LPTI | GRMZM2G158502 | WithinGene |
| chr2.S_176452693 | 2  | 177098606 | 5.57 | ADWPP  | LPTI | GRMZM2G158502 | WithinGene |
| chr2.S_176452809 | 2  | 177098722 | 5.42 | ADWPP  | LPTI | GRMZM2G158502 | WithinGene |
| chr3.S_132396238 | 3  | 132423414 | 5.27 | ADWPP  | LPTI | GRMZM2G063949 | WithinGene |
| chr4.S_224909946 | 4  | 225448290 | 5.06 | ADWPP  | LPTI | GRMZM2G174598 | WithinGene |
| chr1.S_37133693  | 1  | 37138215  | 5.67 | SePCc  | LPTI | GRMZM5G883632 | WithinGene |
| chr1.S_37133694  | 1  | 37138216  | 5.67 | SePCc  | LPTI | GRMZM5G883632 | WithinGene |
| chr1.S_37133695  | 1  | 37138217  | 5.67 | SePCc  | LPTI | GRMZM5G883632 | WithinGene |
| chr1.S_37133696  | 1  | 37138218  | 5.67 | SePCc  | LPTI | GRMZM5G883632 | WithinGene |
| chr1.S_37133697  | 1  | 37138219  | 5.41 | SePCc  | LPTI | GRMZM5G883632 | WithinGene |
| chr2.S_222588610 | 2  | 223257909 | 6.31 | SePCc  | LPTI | GRMZM2G155849 | WithinGene |
| chr2.S_222589848 | 2  | 223259147 | 4.96 | SePCc  | LPTI | GRMZM2G155849 | WithinGene |
| chr2.S_14715146  | 2  | 14726491  | 5.24 | SePCPP | LPTI | GRMZM2G421256 | WithinGene |
| chr4.S_6073942   | 4  | 6078678   | 5.29 | SePCPP | LPTI | GRMZM5G832890 | WithinGene |
| chr6.S_168920663 | 6  | 169128066 | 5.71 | SePCPP | LPTI | GRMZM2G127426 | WithinGene |
| chr8.S_29982167  | 8  | 29986970  | 5.28 | SePCPP | LPTI | GRMZM2G072791 | WithinGene |
| chr4.S_234211683 | 4  | 234750916 | 4.99 | SePUtE | LPTI | GRMZM2G533536 | InterGene  |
| chr4.S_234211683 | 4  | 234750916 | 4.99 | SePUtE | LPTI | GRMZM2G084296 | InterGene  |
| chr4.S_234211683 | 4  | 234750916 | 4.99 | SePUtE | LPTI | GRMZM2G084314 | InterGene  |
| chr4.S_234406903 | 4  | 234946136 | 5.16 | SePUtE | LPTI | GRMZM2G039848 | WithinGene |
| chr6.S_2720972   | 6  | 2723860   | 5.21 | SePUtE | LPTI | GRMZM2G523025 | InterGene  |
| chr6.S_2720972   | 6  | 2723860   | 5.21 | SePUtE | LPTI | GRMZM2G068854 | InterGene  |
| chr6.S_2720972   | 6  | 2723860   | 5.21 | SePUtE | LPTI | GRMZM2G367941 | InterGene  |
| chr6.S_160234907 | 6  | 160430429 | 4.97 | SePUtE | LPTI | GRMZM2G132212 | WithinGene |
| chr7.S_8178542   | 7  | 8183486   | 5.47 | ShPCc  | LPTI | GRMZM2G076630 | WithinGene |
| chr7.S_8178542   | 7  | 8183486   | 5.47 | ShPCc  | LPTI | GRMZM2G377761 | WithinGene |
| chr7.S_8178577   | 7  | 8183521   | 5.09 | ShPCc  | LPTI | GRMZM2G076630 | WithinGene |
| chr7.S_8178577   | 7  | 8183521   | 5.09 | ShPCc  | LPTI | GRMZM2G377761 | WithinGene |
| chr7.S_8178590   | 7  | 8183534   | 6.51 | ShPCc  | LPTI | GRMZM2G076630 | WithinGene |
| chr7.S_8178590   | 7  | 8183534   | 6.51 | ShPCc  | LPTI | GRMZM2G377761 | WithinGene |
| chr8.S_164619610 | 8  | 164169058 | 5.07 | ShPCc  | LPTI | GRMZM2G080816 | WithinGene |
| chr10.S_3164087  | 10 | 3167042   | 5.67 | ShPCc  | LPTI | GRMZM2G356817 | WithinGene |
| chr10.S_3164087  | 10 | 3167042   | 5.67 | ShPCc  | LPTI | GRMZM5G821769 | WithinGene |
| chr10.S_3164219  | 10 | 3167174   | 5.38 | ShPCc  | LPTI | GRMZM2G356817 | WithinGene |
| chr10.S_3164219  | 10 | 3167174   | 5.38 | ShPCc  | LPTI | GRMZM5G821769 | WithinGene |
| chr10.S_3164433  | 10 | 3167388   | 4.99 | ShPCc  | LPTI | GRMZM2G356817 | WithinGene |
| chr10.S_3164433  | 10 | 3167388   | 4.99 | ShPCc  | LPTI | GRMZM5G821769 | WithinGene |

|                  |   |           |      |        |      |               |            |
|------------------|---|-----------|------|--------|------|---------------|------------|
| chr1.S_68438365  | 1 | 68446088  | 4.95 | ShPCPP | LPTI | GRMZM2G003530 | WithinGene |
| chr2.S_63789107  | 2 | 64419510  | 9.39 | ShPCPP | LPTI | GRMZM2G001084 | WithinGene |
| chr5.S_23184282  | 5 | 23204307  | 7.79 | ShPCPP | LPTI | GRMZM2G339562 | WithinGene |
| SYN38866         | 5 | 212368556 | 4.99 | ShPCPP | LPTI | GRMZM5G885644 | WithinGene |
| chr1.S_46865308  | 1 | 46869830  | 5.33 | ShPUtE | LPTI | GRMZM2G129302 | WithinGene |
| chr1.S_270558127 | 1 | 270624812 | 5.06 | ShPUtE | LPTI | GRMZM2G133183 | WithinGene |
| chr1.S_270558159 | 1 | 270624844 | 5.06 | ShPUtE | LPTI | GRMZM2G133183 | WithinGene |
| chr1.S_270558168 | 1 | 270624853 | 5.06 | ShPUtE | LPTI | GRMZM2G133183 | WithinGene |
| chr1.S_270558191 | 1 | 270624876 | 5.06 | ShPUtE | LPTI | GRMZM2G133183 | WithinGene |
| chr1.S_270558206 | 1 | 270624891 | 5.06 | ShPUtE | LPTI | GRMZM2G133183 | WithinGene |
| chr1.S_270558316 | 1 | 270625001 | 5.08 | ShPUtE | LPTI | GRMZM2G133183 | WithinGene |
| PZE-102018940    | 2 | 8997706   | 5.01 | ShPUtE | LPTI | GRMZM2G000052 | WithinGene |
| chr7.S_8178590   | 7 | 8183534   | 5.15 | ShPUtE | LPTI | GRMZM2G076630 | WithinGene |
| chr7.S_8178590   | 7 | 8183534   | 5.15 | ShPUtE | LPTI | GRMZM2G377761 | WithinGene |
| chr1.S_105151135 | 1 | 105159610 | 5.1  | SDWPP  | LPTI | GRMZM5G868757 | InterGene  |
| chr1.S_105325156 | 1 | 105335709 | 5.08 | SDWPP  | LPTI | GRMZM2G457147 | WithinGene |
| chr1.S_273899522 | 1 | 273966524 | 5.62 | SDWPP  | LPTI | GRMZM2G361593 | WithinGene |
| chr1.S_273899522 | 1 | 273966524 | 5.62 | SDWPP  | LPTI | GRMZM5G863590 | WithinGene |
| chr1.S_273899582 | 1 | 273966584 | 5.62 | SDWPP  | LPTI | GRMZM2G361593 | WithinGene |
| chr1.S_273899582 | 1 | 273966584 | 5.62 | SDWPP  | LPTI | GRMZM5G863590 | WithinGene |
| chr6.S_106351747 | 6 | 106520193 | 5.11 | SDWPP  | LPTI | GRMZM2G129375 | WithinGene |
| chr6.S_153257357 | 6 | 153451214 | 5.02 | SDWPP  | LPTI | GRMZM2G169943 | WithinGene |
| chr1.S_290933926 | 1 | 291006770 | 5.56 | YPP    | LPTI | GRMZM2G104125 | WithinGene |

Note: Position: The physical position (B73 RefGen\_v3) of significant SNP; YPP: Yield per plant; ADWPP: All dry weight per plant; SDWPP: Shoot dry weight per plant; SePCc: Seed P concentration; SePCPP: Seed P content per plant; SePUtE: Seed P utilization efficiency; ShPCc: Shoot P concentration; ShPCPP: Shoot P content per plant; ShPUtE: Shoot P utilization efficiency; APCPP: P content per plant; APUtE: All P utilization efficiency. Maker position: The significant SNPs were in the target gene (WithinGene) or between two genes (InterGene).
