# Supplementary material for: Genetic Dissection of Phosphorus Use Efficiency in a Maize Association Population under Two P Levels in the Field
Source: Int J Mol Sci. 2021 Aug 27;22(17):9311. doi: 10.3390/ijms22179311 (PMC8430673; doi:10.3390/ijms22179311)
Supplement: Supplementary file 1 [file ijms-22-09311-s001.zip]

Archive with 17 entries (17 files):
- Supplementary files_proofreading_20210827/~$ption of supplementary files.docx
- Supplementary files_proofreading_20210827/Caption of supplementary files.pdf
- Supplementary files_proofreading_20210827/Figure S1.png
- Supplementary files_proofreading_20210827/Figure S2.png
- Supplementary files_proofreading_20210827/Figure S3.png
- Supplementary files_proofreading_20210827/Figure S4-Part1.png
- Supplementary files_proofreading_20210827/Figure S4-Part2.png
- Supplementary files_proofreading_20210827/Figure S5-Part1.png
- Supplementary files_proofreading_20210827/Figure S5-Part2.png
- Supplementary files_proofreading_20210827/Figure S6-Part1.png
- Supplementary files_proofreading_20210827/Figure S6-Part2.png
- Supplementary files_proofreading_20210827/Figure S7.png
- Supplementary files_proofreading_20210827/Figure S8.png
- Supplementary files_proofreading_20210827/Figure S9.png
- Supplementary files_proofreading_20210827/Table S1.pdf
- Supplementary files_proofreading_20210827/Table S2 Information of PHT1 gene family in four species.xlsx
- Supplementary files_proofreading_20210827/Table S3.pdf
