# Supplementary material for: Genetic Dissection of Phosphorus Use Efficiency in a Maize Association Population under Two P Levels in the Field
Source: Int J Mol Sci. 2021 Aug 27;22(17):9311. doi: 10.3390/ijms22179311 (PMC8430673; doi:10.3390/ijms22179311)
Supplement: Supplementary file 1 [file ijms-22-09311-s001.zip › Supplementary files_proofreading_20210827/Table S2 Information of PHT1 gene family in four species.xlsx]

## Sheet: Sheet1
Table S2 Information of PHT1 gene family in four species
Gene	Specie	Protein	Description
GRMZM2G326707	maize	GRMZM2G326707_P01	ZmPHT1;1
GRMZM2G139639	maize	GRMZM2G139639_P01	ZmPHT1;2
GRMZM2G112377	maize	GRMZM2G112377_P01	ZmPHT1;3
GRMZM2G170208	maize	GRMZM2G170208_P01	ZmPHT1;4
GRMZM2G041595	maize	GRMZM2G041595_P01	ZmPHT1;5
GRMZM5G881088	maize	GRMZM5G881088_P01	ZmPHT1;6
GRMZM2G075870	maize	GRMZM2G075870_P01	ZmPHT1;7
GRMZM2G045473	maize	GRMZM2G045473_P01	ZmPHT1;8
GRMZM2G154090	maize	GRMZM2G154090_P01	ZmPHT1;9
GRMZM2G159075	maize	GRMZM2G159075_P01	ZmPHT1;10
GRMZM2G009779	maize	GRMZM2G009779_P01	ZmPHT1;11
GRMZM2G009800	maize	GRMZM2G009800_P01	ZmPHT1;12
GRMZM2G070087	maize	GRMZM2G070087_P01	ZmPHT1;13
At5G43350	arabidopsis	At5G43350.1	Pht1;1
At5G43370	arabidopsis	At5G43370.1	Pht1;2
At5G43360	arabidopsis	At5G43360.1	Pht1;3
AT2G38940	arabidopsis	AT2G38940.1	Pht1;4
AT2G32830	arabidopsis	AT2G32830.1	Pht1;5
At5G43340	arabidopsis	At5G43340.1	Pht1;6
At3G54700	arabidopsis	At3G54700.1	Pht1;7
AT1G20860	arabidopsis	AT1G20860.1	Pht1;8
AT1G76430	arabidopsis	AT1G76430.1	Pht1;9
Os03g0150600	rice	Os03t0150600-01	OsPht1;1
Os03g0150800	rice	Os03t0150800-01	OsPht1;2
Os10g0444600	rice	Os10t0444600-00	OsPht1;3
Os04g0186400	rice	Os04t0186400-01	OsPht1;4
Os04g0185600	rice	Os04t0185600-00	OsPht1;5
Os08g0564000	rice	Os08t0564000-01	OsPht1;6
Os03g0136400	rice	Os03t0136400-01	OsPht1;7
Os10g0444700	rice	Os10t0444700-01	OsPht1;8
Os06g0324800	rice	Os06t0324800-01	OsPht1;9
Os06g0325200	rice	Os06t0325200-01	OsPht1;10
Os01g0657100	rice	Os01t0657100-01	OsPht1;11
Os03g0150500	rice	Os03t0150500-01	OsPht1;12
Os04g0186800	rice	Os04t0186800-00	OsPht1;13
SORBI_3006G027300	sorghum	OQU81206	probable inorganic phosphate transporter 1-4
SORBI_3001G502100	sorghum	EER95493	probable inorganic phosphate transporter 1-12
SORBI_3001G502000	sorghum	EER92843	inorganic phosphate transporter 1-2
SORBI_3006G026800	sorghum	EES11845	putative inorganic phosphate transporter 1-13
SORBI_3010G133300	sorghum	EER88333	probable inorganic phosphate transporter 1-10
SORBI_3001G234900	sorghum	EER94156	probable inorganic phosphate transporter 1-3
SORBI_3001G234800	sorghum	EER91556	probable inorganic phosphate transporter 1-8
SORBI_3006G026900	sorghum	EES10479	putative inorganic phosphate transporter 1-13
SORBI_3003G243400	sorghum	EES03373	inorganic phosphate transporter 1-11
SORBI_3002G116100	sorghum	EER98411	probable inorganic phosphate transporter 1-4
SORBI_3007G164400	sorghum	OQU80695	inorganic phosphate transporter 1-6
